# Supplementary material for: Implementation of IT supported standardization of individualized hydrocortisone management for treatment of patients with adrenal insufficiency
Source: publisher site journal article supplement (doi:10.1515/jpem-2023-0313), 2023-11-02
Supplement: Supplementary file 1 [file j_jpem-2023-0313_suppl_002.docx]

**Supplemental Document 2: AI Smart Phrase Example**

Your child has Adrenal Gland insufficiency.

The adrenal glands sit above the kidneys and make several hormones including cortisol – a hormone that helps the body respond to stress, regulate blood sugar, and feel well while fighting infections.

Hydrocortisone is a medication that can take the place of cortisol.

Your child does/not need regular daily cortisol.

Home Daily Dose (give every day unless not on a daily dose or if giving stress dose):

___mg morning (# of tabs/caps or ml =___)

___mg afternoon (# of tabs/caps or ml =___)

___mg evening (# of tabs/caps or ml =___)

Home Stress Dose (give if sick or if has a fever temp >100.4):

___mg morning (# of tabs/caps or ml =___)

___mg afternoon (# of tabs/caps or ml =___)

___mg evening (# of tabs/caps or ml =___)

Solu-cortef injection (IM) dose (give when your child cannot keep two doses of hydrocortisone or signs of adrenal crisis developing (vomiting, lethargy, difficult to wake up): ___mg

**For Health Care Providers**

BSA:___

In-Patient Stress Dose:

Give __mg IV once (___mg/m2) at time of illness/fever and follow by __ mg IV q6h (___mg/m2/day) until clinically stable/afebrile unless instructed otherwise

Procedure Dose:

Give __mg IV once (___mg/m2) at time of induction of anesthesia and follow by __ mg IV or PO q6h x 4 times (___mg/m2/day) unless instructed otherwise

Crisis Dose:

Give __mg IV once (___mg/m2) and follow by __ mg IV q6h (___mg/m2/day) until clinically improving and then can go down to in-patient stress dose

*Please call ***-***-**** and ask for the endocrinologist on call with any questions.*
